# Supplementary material for: Structural, Mechanical, and Barrier Properties of the Polyvinylidene Fluoride-Bacterial Nanocellulose-Based Hybrid Composite
Source: MDPI journal article supplement (doi:10.3390/polym16081033), 2024-04-10

Figure S1: SEM of the sample PVDF/BT0/BNC/Fe<sub>3</sub>O<sub>4</sub>, BNC/Fe<sub>3</sub>O<sub>4</sub> surface side (x4500,10kV)

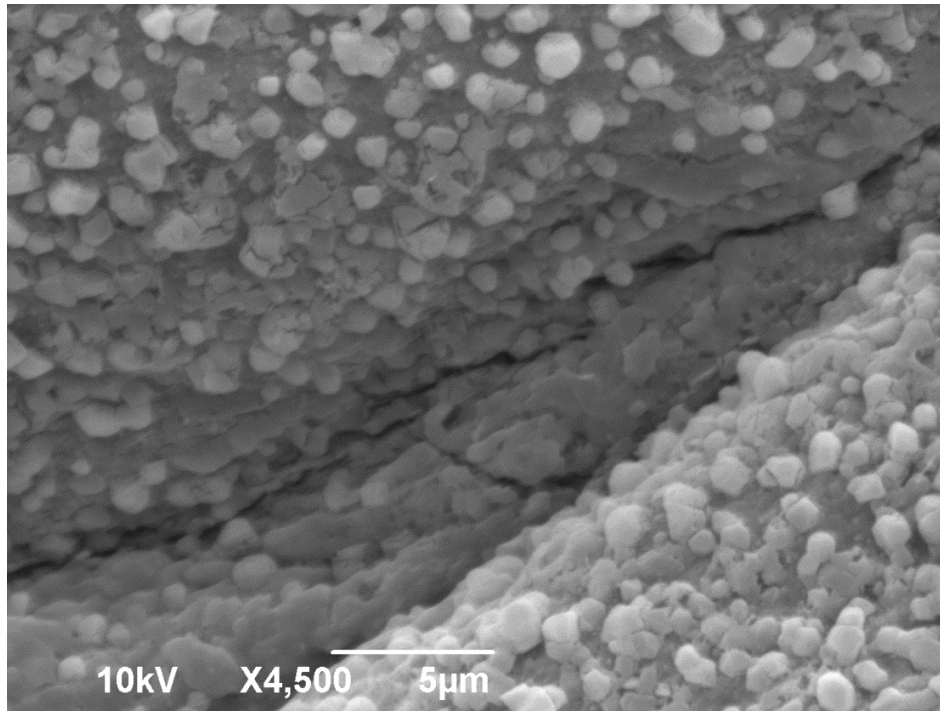

Figure S2: SEM of the sample PVDF/BT0/BNC/Fe<sub>3</sub>O<sub>4</sub>, PVDF/BT surface side (x450,10kV)

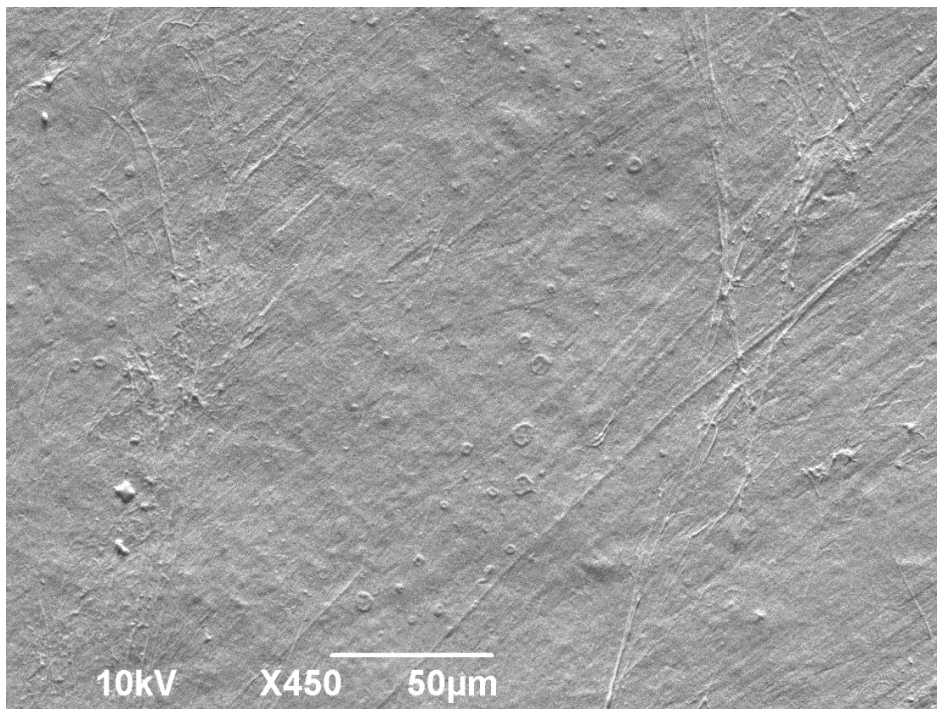

Supplement: s1 [file s1]
